# Supplementary material for: The Interaction of the Endocannabinoid Anandamide and Paracannabinoid Lysophosphatidylinositol during Cell Death Induction in Human Breast Cancer Cells
Source: MDPI journal article supplement (doi:10.3390/ijms25042271), 2024-02-14
Supplement: s1 [file s1]

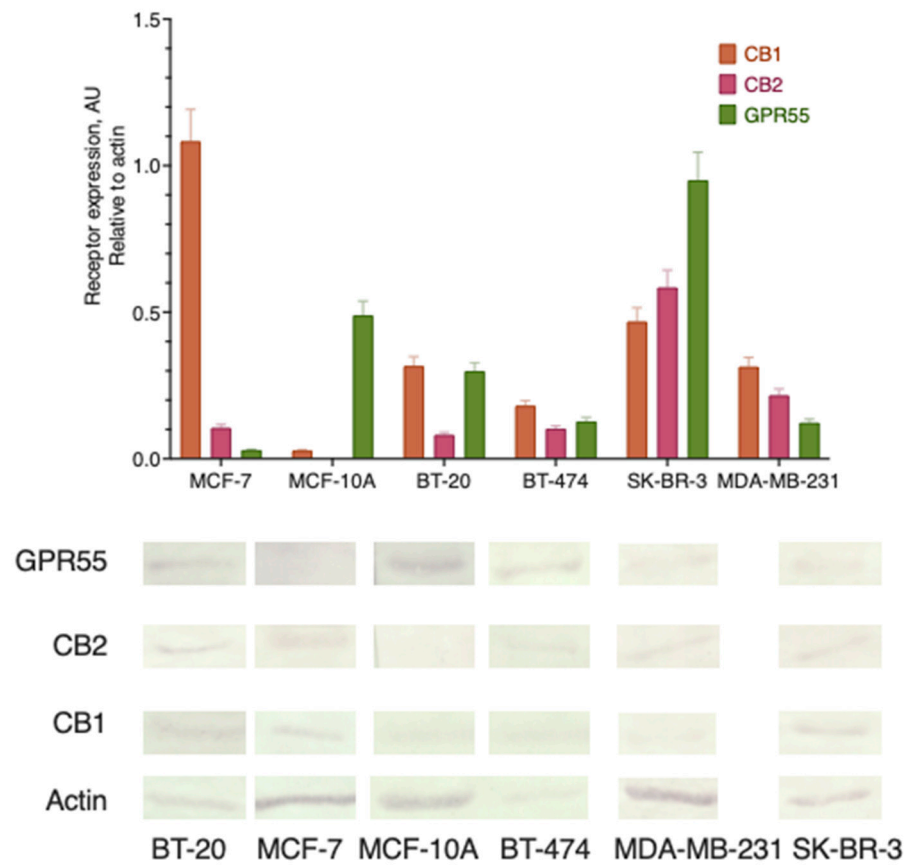

**Supplement Figure S1.** Western blot evaluation of the cannabinoid receptor expression in the model cell lines.
